# Supplementary material
Source: MDPI journal article supplement (https://www.mdpi.com/2076-3263/12/4/143)
Supplement: s1 [file s1]

# Organic Geochemical Data from the Prince Creek Formation, Alaska

**Table S1.** Total organic carbon  $\delta^{13}\text{C}$  (TOC, ‰, VPDB) values and weight percent TOC (wt. % TOC).

| Sample ID | Age | $\delta^{13}\text{C}_{\text{TOC}}$ | 1 $\sigma$ | N | Wt. % TOC | 1 $\sigma$ | N |
|-----------|-----|------------------------------------|------------|---|-----------|------------|---|
| 19DH-006  | PE  | -27.4                              |            | 1 | 62.9      |            | 1 |
| 08DH-005  | PE  | -27.4                              |            | 1 | 59.9      |            | 1 |
| 19DH-004  | PE  | -27.6                              |            | 1 | 63.7      |            | 1 |
| 19DH-002  | PE  | -27.8                              |            | 1 | 60.4      |            | 1 |
| 19DH-003  | PE  | -26.9                              |            | 1 | 42.4      |            | 1 |
| 12DH-020  | PE  | -26.3                              |            | 1 | 54.9      |            | 1 |
| 10DH-037  | PE  | -25.9                              |            | 1 | 62.3      |            | 1 |
| NKT-31    | K   | -29.9                              |            | 1 | 2.3       |            | 1 |
| NKT-32    | K   | -28.7                              | 0.0        | 3 | 4.0       | 0.1        | 3 |
| NKT-51    | K   | -28.2                              |            | 1 | 3.9       |            | 1 |
| 06SH-2.5  | K   | -28.8                              |            | 1 | 9.2       |            | 1 |
| NKT-7     | K   | -28.7                              |            | 1 | 3.7       |            | 1 |
| LBB-07    | K   | -27.3                              |            | 1 | 12.4      |            | 1 |
| LBB-24    | K   | -28.5                              |            | 1 | 5.0       |            | 1 |
| LBB-20    | K   | -27.5                              |            | 1 | 13.5      |            | 1 |
| 06SH-16   | K   | -27.3                              | 0.0        | 3 | 5.7       | 0.1        | 3 |
| 06SH-9.4  | K   | -27.4                              |            | 1 | 4.4       |            | 1 |
| 06SH-16.6 | K   | -26.6                              |            | 1 | 44.1      |            | 1 |
| 06SH-14.6 | K   | -27.0                              |            | 1 | 8.6       |            | 1 |
| 06SH-16.1 | K   | -27.0                              | 0.2        | 3 | 19.0      | 1.7        | 3 |

Note: PE = Paleocene samples; K = Cretaceous samples

**Table S2.** *n*-Alkane concentrations ( $\mu\text{g/g}$ ) from *n*-C<sub>16</sub> to *n*-C<sub>37</sub> alkane

| Sample ID | Age | C <sub>16</sub> | C <sub>17</sub> | C <sub>18</sub> | C <sub>19</sub> | C <sub>20</sub> | C <sub>21</sub> | C <sub>22</sub> | C <sub>23</sub> | C <sub>24</sub> | C <sub>25</sub> | C <sub>26</sub> | C <sub>27</sub> | C <sub>28</sub> | C <sub>29</sub> | C <sub>30</sub> | C <sub>31</sub> | C <sub>32</sub> | C <sub>33</sub> | C <sub>34</sub> | C <sub>35</sub> | C <sub>36</sub> | C <sub>37</sub> |
|-----------|-----|-----------------|-----------------|-----------------|-----------------|-----------------|-----------------|-----------------|-----------------|-----------------|-----------------|-----------------|-----------------|-----------------|-----------------|-----------------|-----------------|-----------------|-----------------|-----------------|-----------------|-----------------|-----------------|
| 19DH-006  | PE  | 0.0             | 0.0             | 0.0             | 0.0             | 0.1             | 0.1             | 0.4             | 0.1             | 0.4             | 0.1             | 0.2             | 0.0             | 0.1             | 0.0             | 0.1             | 0.0             | 0.1             | 0.0             | 0.1             | 0.0             | 0.0             | 0.0             |
| 08DH-005  | PE  | 0.7             | 0.5             | 0.6             | 1.2             | 3.5             | 4.4             | 2.4             | 4.0             | 2.8             | 3.8             | 1.3             | 3.8             | 0.9             | 4.3             | 0.5             | 2.6             | 0.0             | 2.8             | 1.3             | 0.1             | 0.0             | 0.0             |
| 19DH-004  | PE  | 0.0             | 0.0             | 0.1             | 0.2             | 0.2             | 0.6             | 0.4             | 2.7             | 0.5             | 1.8             | 0.2             | 0.9             | 0.1             | 0.4             | 0.1             | 0.2             | 0.0             | 0.3             | 0.0             | 0.1             | 0.0             | 0.0             |
| 19DH-002  | PE  | 0.1             | 0.3             | 0.5             | 1.8             | 1.5             | 1.6             | 1.4             | 8.5             | 2.7             | 13.7            | 1.7             | 7.5             | 1.3             | 6.7             | 1.1             | 4.1             | 0.2             | 3.3             | 0.2             | 2.8             | 0.0             | 0.0             |
| 19DH-003  | PE  | 0.9             | 1.1             | 1.4             | 3.3             | 1.5             | 5.1             | 4.8             | 33.7            | 9.7             | 36.6            | 9.3             | 28.8            | 7.9             | 24.4            | 2.2             | 8.5             | 0.0             | 6.9             | 0.0             | 3.8             | 0.0             | 0.0             |
| 12DH-020  | PE  | 0.4             | 0.3             | 0.5             | 1.1             | 0.9             | 2.2             | 1.3             | 8.0             | 1.9             | 12.6            | 1.6             | 13.5            | 1.5             | 11.1            | 1.8             | 11.8            | 1.0             | 12.2            | 0.6             | 3.1             | 0.0             | 0.2             |
| 10DH-037  | PE  | 2.1             | 3.0             | 3.6             | 5.2             | 4.0             | 3.6             | 4.6             | 6.0             | 3.7             | 5.4             | 3.2             | 3.6             | 1.8             | 2.5             | 0.8             | 1.3             | 0.4             | 0.7             | 0.0             | 0.1             | 0.0             | 0.0             |
| NKT-31    | K   | 0.2             | 0.3             | 0.5             | 1.1             | 1.0             | 4.3             | 3.3             | 15.3            | 3.8             | 8.8             | 3.3             | 9.0             | 2.5             | 5.6             | 0.9             | 2.5             | 0.4             | 2.8             | 0.2             | 0.5             | 0.0             | 0.1             |
| NKT-32    | K   | 0.4             | 0.5             | 0.6             | 0.9             | 1.7             | 3.4             | 2.6             | 13.3            | 2.4             | 10.1            | 2.0             | 8.1             | 1.3             | 5.8             | 0.4             | 1.4             | 0.3             | 0.5             | 0.1             | 0.1             | 0.1             | 0.2             |
| NKT-51    | K   | 0.3             | 0.4             | 0.6             | 0.7             | 0.8             | 2.3             | 2.2             | 11.4            | 3.0             | 9.2             | 2.4             | 7.2             | 1.4             | 4.8             | 0.7             | 1.8             | 0.2             | 1.3             | 0.1             | 0.3             | 0.0             | 0.0             |
| 06SH-2.5  | K   | 0.5             | 0.6             | 0.7             | 0.8             | 1.0             | 3.9             | 2.6             | 19.6            | 3.3             | 16.5            | 2.4             | 16.4            | 1.8             | 8.1             | 0.9             | 2.5             | 0.3             | 0.8             | 0.1             | 0.1             | 0.0             | 0.0             |
| NKT-7     | K   | 0.5             | 0.6             | 0.8             | 0.5             | 0.6             | 0.4             | 0.5             | 1.0             | 0.4             | 0.8             | 0.5             | 1.5             | 0.7             | 3.1             | 0.7             | 1.3             | 0.0             | 1.1             | 0.0             | 0.2             | 0.0             | 0.0             |
| LBB-07    | K   | 0.8             | 1.2             | 1.6             | 1.8             | 1.5             | 3.3             | 2.4             | 10.6            | 3.2             | 7.2             | 3.1             | 16.4            | 3.7             | 21.1            | 2.5             | 15.9            | 1.9             | 10.1            | 0.5             | 0.8             | 0.0             | 0.0             |
| LBB-24    | K   | 0.2             | 0.7             | 0.6             | 1.3             | 0.8             | 5.2             | 2.8             | 18.8            | 3.4             | 11.7            | 3.3             | 20.2            | 3.6             | 17.6            | 2.2             | 7.2             | 1.0             | 3.0             | 0.1             | 0.3             | 0.0             | 0.0             |
| LBB-20    | K   | 0.5             | 0.8             | 0.9             | 1.4             | 1.9             | 8.8             | 4.5             | 56.5            | 6.9             | 66.6            | 4.2             | 24.7            | 2.8             | 10.9            | 1.4             | 2.9             | 0.6             | 1.5             | 0.1             | 0.1             | 0.0             | 0.0             |
| 06SH-16   | K   | 0.4             | 0.5             | 0.8             | 0.5             | 0.8             | 1.0             | 1.1             | 4.1             | 0.9             | 3.7             | 0.5             | 2.6             | 0.4             | 2.0             | 0.4             | 0.7             | 0.1             | 0.2             | 0.0             | 0.0             | 0.0             | 0.0             |
| 06SH-9.4  | K   | 0.1             | 0.4             | 0.4             | 1.2             | 0.7             | 3.9             | 2.6             | 14.6            | 2.5             | 8.9             | 2.3             | 14.1            | 2.2             | 12.8            | 1.6             | 4.3             | 0.5             | 2.3             | 0.1             | 0.3             | 0.0             | 0.0             |
| 06SH-16.6 | K   | 0.0             | 0.1             | 0.1             | 0.2             | 0.2             | 1.0             | 0.9             | 6.6             | 1.3             | 6.7             | 1.0             | 8.1             | 0.8             | 5.0             | 0.5             | 2.5             | 0.0             | 1.0             | 0.0             | 0.2             | 0.0             | 0.0             |
| 06SH-14.6 | K   | 0.1             | 0.2             | 0.3             | 0.5             | 0.5             | 2.0             | 1.8             | 19.4            | 3.6             | 23.3            | 2.6             | 13.6            | 2.3             | 7.9             | 0.9             | 2.2             | 0.0             | 1.6             | 0.0             | 0.3             | 0.0             | 0.0             |
| 06SH-16.1 | K   | 0.2             | 0.5             | 0.5             | 1.3             | 1.2             | 5.7             | 5.1             | 30.4            | 6.7             | 19.9            | 4.5             | 19.0            | 3.8             | 17.6            | 2.0             | 4.2             | 0.5             | 1.5             | 0.1             | 0.3             | 0.0             | 0.0             |

**Table S3.** Pristane and phytane concentrations (µg/g)

| Sample ID | Age | Pristane | Phytane |
|-----------|-----|----------|---------|
| 19DH-006  | PE  | 0.0      | 0.0     |
| 08DH-005  | PE  | 1.0      | 0.3     |
| 19DH-004  | PE  | 0.0      | 0.0     |
| 19DH-002  | PE  | 0.2      | 0.0     |
| 19DH-003  | PE  | 0.2      | 0.0     |
| 12DH-020  | PE  | 0.0      | 0.0     |
| 10DH-037  | PE  | 5.4      | 0.0     |
| NKT-31    | K   | 0.1      | 0.0     |
| NKT-32    | K   | 0.1      | 0.0     |
| NKT-51    | K   | 0.2      | 0.0     |
| 06SH-2.5  | K   | 0.4      | 0.0     |
| NKT-7     | K   | 0.4      | 0.0     |
| LBB-07    | K   | 0.0      | 0.0     |
| LBB-24    | K   | 0.0      | 0.0     |
| LBB-20    | K   | 0.2      | 0.2     |
| 06SH-16   | K   | 0.1      | 0.2     |
| 06SH-9.4  | K   | 0.1      | 0.0     |
| 06SH-16.6 | K   | 0.0      | 0.0     |
| 06SH-14.6 | K   | 0.1      | 0.0     |
| 06SH-16.1 | K   | 0.1      | 0.0     |

**Table S4.** Hopane concentrations (µg/g)

| Sample ID | Age | 17a(H)-22,29,30-Trisnorhopane | 17b(H)-22,29,30-Trisnorhopane | 17a(H),21b-30-Norhopane | 17b(H)-30-Normoretane | 17a(H),21b(H)-Hopane | A'-Neogammacer-22(29)-ene | 17b(H),21b(H)-30-Norhopane AND 17b(H),21a(H)-moretane | 17a(H),21b(H)-Homohopane, [22R] | 17b(H),21b(H)-hopane AND 17b(H),21a(H)-homomoretane | 17a(H),21b(H)-Bishomohopane | 17b(H),21a(H)-bishomomoretane | 17b(H),21b(H)-Homohopane | 17b(H),21b(H)-Bishomohopane |
|-----------|-----|-------------------------------|-------------------------------|-------------------------|-----------------------|----------------------|---------------------------|-------------------------------------------------------|---------------------------------|-----------------------------------------------------|-----------------------------|-------------------------------|--------------------------|-----------------------------|
| 19DH-006  | PE  | 0.0                           | 0.0                           | 0.0                     | 0.0                   | 0.0                  | 0.0                       | 0.0                                                   | 0.1                             | 0.0                                                 | 0.0                         | 0.0                           | 0.0                      | 0.0                         |
| 08DH-005  | PE  | 0.0                           | 0.4                           | 0.0                     | 0.0                   | 0.4                  | 3.0                       | 0.8                                                   | 0.0                             | 0.5                                                 | 0.0                         | 0.1                           | 1.4                      | 0.0                         |
| 19DH-004  | PE  | 0.0                           | 0.1                           | 0.0                     | 0.0                   | 0.0                  | 0.9                       | 0.1                                                   | 0.3                             | 0.0                                                 | 0.0                         | 0.0                           | 0.0                      | 0.0                         |
| 19DH-002  | PE  | 0.0                           | 1.7                           | 0.0                     | 0.7                   | 0.0                  | 11.2                      | 1.7                                                   | 1.4                             | 0.9                                                 | 0.0                         | 0.0                           | 1.8                      | 0.0                         |
| 19DH-003  | PE  | 0.0                           | 6.0                           | 0.0                     | 2.8                   | 1.0                  | 9.7                       | 7.3                                                   | 15.2                            | 5.2                                                 | 0.3                         | 0.5                           | 16.1                     | 0.0                         |
| 12DH-020  | PE  | 0.0                           | 1.4                           | 0.0                     | 0.0                   | 0.0                  | 3.3                       | 1.7                                                   | 3.9                             | 1.1                                                 | 0.0                         | 0.1                           | 2.8                      | 0.0                         |
| 10DH-037  | PE  | 0.7                           | 0.7                           | 0.6                     | 0.5                   | 0.8                  | 0.0                       | 0.5                                                   | 1.2                             | 0.5                                                 | 0.3                         | 0.1                           | 0.0                      | 0.0                         |
| NKT-31    | K   | 0.1                           | 1.4                           | 0.2                     | 0.4                   | 0.2                  | 1.6                       | 0.8                                                   | 0.5                             | 0.5                                                 | 0.1                         | 0.0                           | 1.1                      | 0.0                         |
| NKT-32    | K   | 0.0                           | 0.5                           | 0.1                     | 0.1                   | 0.1                  | 0.4                       | 0.3                                                   | 0.0                             | 0.1                                                 | 0.0                         | 0.0                           | 0.6                      | 0.0                         |
| NKT-51    | K   | 0.0                           | 0.7                           | 0.2                     | 0.1                   | 0.2                  | 0.8                       | 0.5                                                   | 0.3                             | 0.3                                                 | 0.0                         | 0.0                           | 1.0                      | 0.0                         |
| 06SH-2.5  | K   | 0.0                           | 0.6                           | 0.0                     | 0.1                   | 0.0                  | 0.8                       | 0.4                                                   | 0.0                             | 0.2                                                 | 0.0                         | 0.0                           | 0.7                      | 0.0                         |
| NKT-7     | K   | 0.0                           | 1.8                           | 0.0                     | 0.7                   | 0.3                  | 2.3                       | 1.2                                                   | 0.0                             | 0.4                                                 | 0.0                         | 0.0                           | 0.9                      | 0.0                         |
| LBB-07    | K   | 0.0                           | 0.5                           | 0.0                     | 0.0                   | 0.0                  | 0.0                       | 0.1                                                   | 0.0                             | 0.0                                                 | 0.0                         | 0.0                           | 0.3                      | 0.0                         |
| LBB-24    | K   | 0.0                           | 0.3                           | 0.0                     | 0.0                   | 0.1                  | 0.1                       | 0.3                                                   | 0.0                             | 0.1                                                 | 0.0                         | 0.0                           | 0.3                      | 0.0                         |
| LBB-20    | K   | 0.0                           | 0.6                           | 0.0                     | 0.3                   | 0.1                  | 0.2                       | 0.8                                                   | 0.0                             | 0.3                                                 | 0.0                         | 0.0                           | 1.2                      | 0.0                         |
| 06SH-16   | K   | 0.0                           | 0.3                           | 0.0                     | 0.1                   | 0.0                  | 0.7                       | 0.2                                                   | 0.2                             | 0.1                                                 | 0.0                         | 0.0                           | 0.4                      | 0.0                         |
| 06SH-9.4  | K   | 0.0                           | 0.3                           | 0.1                     | 0.1                   | 0.0                  | 0.2                       | 0.3                                                   | 0.2                             | 0.1                                                 | 0.0                         | 0.0                           | 0.4                      | 0.0                         |
| 06SH-16.6 | K   | 0.0                           | 0.3                           | 0.0                     | 0.0                   | 0.0                  | 2.2                       | 0.3                                                   | 1.0                             | 0.2                                                 | 0.0                         | 0.0                           | 0.9                      | 0.1                         |
| 06SH-14.6 | K   | 0.0                           | 0.7                           | 0.0                     | 0.3                   | 0.2                  | 2.1                       | 0.9                                                   | 0.0                             | 0.5                                                 | 0.0                         | 0.0                           | 2.3                      | 0.0                         |

|           |   |     |     |     |     |     |     |     |     |     |     |     |     |     |
|-----------|---|-----|-----|-----|-----|-----|-----|-----|-----|-----|-----|-----|-----|-----|
| 06SH-16.1 | K | 0.0 | 0.9 | 0.0 | 0.3 | 0.2 | 0.9 | 0.8 | 0.6 | 0.4 | 0.0 | 0.1 | 1.8 | 0.0 |
|-----------|---|-----|-----|-----|-----|-----|-----|-----|-----|-----|-----|-----|-----|-----|

**Table S5.** Conifer-derived diterpane and diterpene concentrations (µg/g)

| Sample ID | Age | 18-Norisopimarane | 18-Norpimarane | 18-Norabietane | 19-Norabieta-3,8,11,13-tetraene | Pimarane | Abietane | Diterpenoid (Unidentified, MW=274) | Abieta-8,11,13-triene | 2-Methyl-1-(40-methylpentyl)-6-isopropyl | Simonellite isomer A | Simonellite isomer B | Simonellite isomer C | Retenene |
|-----------|-----|-------------------|----------------|----------------|---------------------------------|----------|----------|------------------------------------|-----------------------|------------------------------------------|----------------------|----------------------|----------------------|----------|
| 19DH-006  | PE  | 0.0               | 0.0            | 0.0            | 0.0                             | 0.0      | 0.0      | 0.0                                | 0.1                   | 0.0                                      | 0.0                  | 0.0                  | 0.0                  | 0.0      |
| 08DH-005  | PE  | 3.2               | 77.9           | 0.0            | 0.0                             | 54.7     | 4.6      | 0.4                                | 0.5                   | 0.0                                      | 0.0                  | 0.0                  | 2.6                  | 0.0      |
| 19DH-004  | PE  | 0.1               | 0.8            | 0.0            | 0.2                             | 0.0      | 0.0      | 1.5                                | 1.9                   | 0.0                                      | 1.8                  | 6.7                  | 0.7                  | 0.0      |
| 19DH-002  | PE  | 0.0               | 0.8            | 0.0            | 6.3                             | 0.0      | 0.0      | 0.2                                | 0.9                   | 0.0                                      | 0.2                  | 0.0                  | 0.3                  | 0.0      |
| 19DH-003  | PE  | 0.0               | 0.0            | 0.0            | 0.0                             | 4.1      | 0.0      | 2.0                                | 1.9                   | 0.0                                      | 0.0                  | 3.1                  | 1.0                  | 0.0      |
| 12DH-020  | PE  | 0.0               | 2.1            | 0.8            | 0.0                             | 28.0     | 0.4      | 0.2                                | 1.2                   | 0.1                                      | 0.1                  | 0.0                  | 8.6                  | 5.0      |
| 10DH-037  | PE  | 5.3               | 0.8            | 0.0            | 0.3                             | 0.0      | 0.4      | 0.0                                | 0.2                   | 3.2                                      | 0.0                  | 0.0                  | 2.5                  | 16.7     |
| NKT-31    | K   | 0.0               | 0.0            | 0.0            | 0.0                             | 0.0      | 0.0      | 0.0                                | 0.0                   | 0.0                                      | 0.0                  | 0.0                  | 0.0                  | 0.0      |
| NKT-32    | K   | 0.0               | 0.0            | 0.0            | 0.0                             | 0.0      | 0.0      | 0.0                                | 0.0                   | 0.0                                      | 0.0                  | 0.0                  | 0.0                  | 0.0      |
| NKT-51    | K   | 0.0               | 0.0            | 0.0            | 0.0                             | 0.0      | 0.0      | 0.0                                | 0.0                   | 0.0                                      | 0.0                  | 0.0                  | 0.0                  | 0.1      |
| 06SH-2.5  | K   | 0.0               | 0.0            | 0.0            | 0.0                             | 0.0      | 0.0      | 0.0                                | 0.0                   | 0.0                                      | 0.0                  | 0.0                  | 0.0                  | 0.0      |
| NKT-7     | K   | 0.0               | 0.0            | 0.0            | 0.0                             | 0.0      | 0.0      | 0.0                                | 0.2                   | 0.0                                      | 0.0                  | 0.0                  | 0.1                  | 0.0      |
| LBB-07    | K   | 0.0               | 0.0            | 0.0            | 0.0                             | 0.0      | 0.0      | 0.0                                | 0.0                   | 0.0                                      | 0.0                  | 0.0                  | 0.0                  | 0.0      |
| LBB-24    | K   | 0.0               | 0.0            | 0.0            | 0.0                             | 0.0      | 0.0      | 0.0                                | 0.0                   | 0.0                                      | 0.0                  | 0.0                  | 0.0                  | 0.0      |
| LBB-20    | K   | 0.0               | 0.0            | 0.0            | 0.0                             | 0.1      | 0.0      | 0.1                                | 0.0                   | 0.0                                      | 0.0                  | 0.0                  | 0.0                  | 0.0      |
| 06SH-16   | K   | 0.0               | 0.0            | 0.0            | 0.0                             | 0.0      | 0.0      | 0.1                                | 0.0                   | 0.0                                      | 0.0                  | 0.0                  | 0.1                  | 0.0      |
| 06SH-9.4  | K   | 0.0               | 0.0            | 0.0            | 0.0                             | 0.0      | 0.0      | 0.2                                | 0.0                   | 0.0                                      | 0.1                  | 0.0                  | 0.0                  | 0.0      |
| 06SH-16.6 | K   | 0.1               | 3.5            | 0.2            | 0.0                             | 0.2      | 0.0      | 0.4                                | 0.3                   | 0.5                                      | 0.1                  | 0.1                  | 0.2                  | 0.1      |
| 06SH-14.6 | K   | 0.0               | 0.0            | 0.0            | 0.1                             | 0.0      | 0.0      | 0.2                                | 0.3                   | 0.3                                      | 0.0                  | 0.0                  | 0.3                  | 0.2      |
| 06SH-16.1 | K   | 0.0               | 0.0            | 0.0            | 0.0                             | 0.0      | 0.0      | 0.6                                | 0.3                   | 0.0                                      | 0.0                  | 0.0                  | 0.6                  | 0.0      |

**Table S6.** Biomarker indices and summary concentrations (µg/g)

| Sample ID | Age | $\Sigma$ <i>n</i> -alkanes (odd C <sub>27</sub> to C <sub>33</sub> ) | ACL  | CPI | TAR  | Pr/Ph | Homohopane 22S/(22S+22R) | $\Sigma$ hopanes | Sum diterpenoids |
|-----------|-----|----------------------------------------------------------------------|------|-----|------|-------|--------------------------|------------------|------------------|
| 19DH-006  | PE  | 0.6                                                                  | 27.7 | 4.2 | 4.1  | 0.0   | 0.00                     | 0.3              | 0.2              |
| 08DH-005  | PE  | 13.7                                                                 | 28.7 | 3.3 | 4.0  | 4.0   |                          | 6.5              | 143.9            |
| 19DH-004  | PE  | 1.9                                                                  | 27.1 | 5.1 | 2.3  |       |                          | 1.4              | 13.5             |
| 19DH-002  | PE  | 24.5                                                                 | 28.2 | 5.4 | 5.4  |       |                          | 19.5             | 8.8              |
| 19DH-003  | PE  | 72.5                                                                 | 27.7 | 4.1 | 7.4  |       | 0.03                     | 64.2             | 12.1             |
| 12DH-020  | PE  | 51.7                                                                 | 29.2 | 7.5 | 16.4 |       | 0.02                     | 14.2             | 46.4             |
| 10DH-037  | PE  | 8.2                                                                  | 27.3 | 1.6 | 0.5  |       |                          | 5.9              | 29.5             |
| NKT-31    | K   | 20.4                                                                 | 27.9 | 3.2 | 5.7  |       | 0.09                     | 7.0              | 0.1              |
| NKT-32    | K   | 15.8                                                                 | 27.0 | 5.1 | 5.1  |       | 0.09                     | 2.2              | 0.0              |
| NKT-51    | K   | 15.4                                                                 | 27.3 | 3.8 | 5.9  |       |                          | 4.1              | 0.1              |
| 06SH-2.5  | K   | 27.9                                                                 | 27.0 | 6.2 | 7.9  |       |                          | 2.7              | 0.0              |
| NKT-7     | K   | 7.2                                                                  | 29.2 | 3.3 | 4.2  |       |                          | 7.6              | 0.3              |
| LBB-07    | K   | 64.3                                                                 | 29.2 | 4.9 | 12.4 |       |                          | 0.9              | 0.0              |
| LBB-24    | K   | 48.4                                                                 | 28.0 | 5.0 | 12.5 |       |                          | 1.1              | 0.0              |
| LBB-20    | K   | 40.0                                                                 | 26.2 | 8.4 | 6.3  | 0.7   |                          | 3.5              | 0.2              |
| 06SH-16   | K   | 5.5                                                                  | 27.1 | 4.9 | 2.9  | 0.5   |                          | 1.9              | 0.2              |
| 06SH-9.4  | K   | 33.9                                                                 | 28.0 | 5.3 | 11.0 |       | 0.07                     | 1.7              | 0.3              |
| 06SH-16.6 | K   | 16.8                                                                 | 27.6 | 7.3 | 23.9 |       |                          | 5.1              | 5.5              |
| 06SH-14.6 | K   | 25.6                                                                 | 26.8 | 6.1 | 14.2 |       |                          | 7.1              | 1.2              |
| 06SH-16.1 | K   | 42.6                                                                 | 27.4 | 4.4 | 12.4 |       |                          | 6.0              | 1.5              |

**Table S7.** *n*-Alkane  $\delta^{13}\text{C}$  values (‰, VPDB), calculated leaf  $\delta^{13}\text{C}$  values by *n*-alkane (‰, VPDB), and calculated leaf fractionation ( $\Delta^{13}\text{C}_{\text{leaf}}$ ) values for *n*-C<sub>29</sub> alkane (‰, VPDB)

| Sample ID | Age | $\delta^{13}\text{C}$ <i>n</i> -C <sub>23</sub> | $\delta^{13}\text{C}$ <i>n</i> -C <sub>25</sub> | $\delta^{13}\text{C}$ <i>n</i> -C <sub>27</sub> | $\delta^{13}\text{C}$ <i>n</i> -C <sub>29</sub> | $\delta^{13}\text{C}$ <i>n</i> -C <sub>31</sub> | $\delta^{13}\text{C}$ <i>n</i> -C <sub>33</sub> | $\delta^{13}\text{C}_{\text{leaf}}(n\text{-C}_{27})$ | $\delta^{13}\text{C}_{\text{leaf}}(n\text{-C}_{29})$ | $\delta^{13}\text{C}_{\text{leaf}}(n\text{-C}_{31})$ | $\delta^{13}\text{C}_{\text{leaf}}(n\text{-C}_{33})$ | $\Delta^{13}\text{C}_{\text{leaf}} (n\text{-C}_{29})$ |
|-----------|-----|-------------------------------------------------|-------------------------------------------------|-------------------------------------------------|-------------------------------------------------|-------------------------------------------------|-------------------------------------------------|------------------------------------------------------|------------------------------------------------------|------------------------------------------------------|------------------------------------------------------|-------------------------------------------------------|
| 19DH-006  | PE  | -31.5                                           | -31.8                                           | -33.5                                           | -33.2                                           | -32.9                                           |                                                 | -29.4                                                | -28.6                                                | -27.9                                                |                                                      | 23.5                                                  |
| 08DH-005  | PE  | -31.7                                           | -32.0                                           | -32.3                                           | -31.7                                           | -31.6                                           | -30.3                                           | -28.2                                                | -27.2                                                | -26.7                                                | -25.8                                                | 22.0                                                  |
| 19DH-004  | PE  | -31.6                                           | -32.2                                           | -32.9                                           | -32.5                                           | -32.3                                           |                                                 | -28.8                                                | -27.9                                                | -27.4                                                |                                                      | 22.8                                                  |
| 19DH-002  | PE  | -31.3                                           | -31.0                                           | -33.2                                           | -32.8                                           | -33.0                                           | -31.9                                           | -29.1                                                | -28.2                                                | -28.1                                                | -27.4                                                | 23.1                                                  |
| 19DH-003  | PE  | -32.1                                           | -32.5                                           | -31.5                                           | -31.8                                           | -31.3                                           | -31.7                                           | -27.4                                                | -27.2                                                | -26.3                                                | -27.2                                                | 22.0                                                  |
| 12DH-020  | PE  | -31.6                                           | -31.5                                           | -33.3                                           | -33.0                                           | -32.9                                           | -33.4                                           | -29.2                                                | -28.4                                                | -27.9                                                | -28.9                                                | 23.3                                                  |
| 10DH-037  | PE  | -32.0                                           | -33.3                                           | -32.9                                           | -32.1                                           | -32.6                                           | -31.5                                           | -28.8                                                | -27.5                                                | -27.7                                                | -27.1                                                | 22.3                                                  |
| NKT-31    | K   | -27.9                                           | -29.2                                           | -31.2                                           | -31.9                                           | -31.7                                           | -30.2                                           | -27.2                                                | -27.3                                                | -26.7                                                | -25.7                                                | 22.1                                                  |
| NKT-32    | K   | -30.6                                           | -30.3                                           | -30.8                                           | -31.0                                           | -30.1                                           | -29.0                                           | -26.7                                                | -26.4                                                | -25.1                                                | -24.5                                                | 21.1                                                  |
| NKT-51    | K   | -32.6                                           | -33.4                                           | -34.5                                           | -34.2                                           | -35.1                                           | -35.2                                           | -30.4                                                | -29.6                                                | -30.1                                                | -30.7                                                | 24.6                                                  |
| 06SH-2.5  | K   | -30.2                                           | -31.2                                           | -33.2                                           | -31.8                                           | -31.0                                           | -31.8                                           | -29.2                                                | -27.2                                                | -26.1                                                | -27.3                                                | 22.0                                                  |
| NKT-7     | K   | -30.5                                           | -31.4                                           | -32.7                                           | -32.3                                           | -32.9                                           | -32.1                                           | -28.6                                                | -27.7                                                | -27.9                                                | -27.6                                                | 22.5                                                  |
| LBB-07    | K   | -30.5                                           | -31.1                                           | -31.9                                           | -31.5                                           | -32.4                                           | -33.5                                           | -27.9                                                | -26.9                                                | -27.4                                                | -29.0                                                | 21.7                                                  |
| LBB-24    | K   | -31.6                                           | -31.7                                           | -32.0                                           | -31.3                                           | -31.3                                           | -31.3                                           | -27.9                                                | -26.7                                                | -26.4                                                | -26.8                                                | 21.5                                                  |
| LBB-20    | K   | -31.2                                           | -34.9                                           | -32.2                                           | -32.7                                           | -33.9                                           | -33.2                                           | -28.1                                                | -28.1                                                | -29.0                                                | -28.8                                                | 23.0                                                  |

|           |   |       |       |       |       |       |       |       |       |       |       |      |
|-----------|---|-------|-------|-------|-------|-------|-------|-------|-------|-------|-------|------|
| 06SH-16   | K | -31.9 | -32.6 | -33.2 | -32.7 | -33.0 | -33.3 | -29.1 | -28.2 | -28.1 | -28.8 | 23.0 |
| 06SH-9.4  | K | -32.1 | -33.2 | -33.3 | -31.8 | -32.7 | -33.3 | -29.2 | -27.3 | -27.8 | -28.9 | 22.1 |
| 06SH-16.6 | K | -31.3 | -32.5 | -32.7 | -32.3 | -32.4 | -30.8 | -28.6 | -27.7 | -27.5 | -26.3 | 22.5 |
| 06SH-14.6 | K | -31.9 | -31.9 | -33.7 | -33.9 | -33.3 | -32.8 | -29.7 | -29.3 | -28.3 | -28.3 | 24.2 |
| 06SH-16.1 | K | -31.6 | -32.1 | -33.5 | -32.9 | -32.6 | -31.6 | -29.5 | -28.3 | -27.7 | -27.1 | 23.1 |

**Table S8.** Hopane  $\delta^{13}\text{C}$  values (‰, VPDB)

| Sample ID | Age | $\delta^{13}\text{C}$ 17a(H)-22,29,30-Trisnorhopane | $\delta^{13}\text{C}$ 17a(H),21b(H)-Homohopane (22R) | $\delta^{13}\text{C}$ 17a(H),21b(H)-Hopane | $\delta^{13}\text{C}$ 17a(H),21b(H)-30-Norhopane | $\delta^{13}\text{C}$ 17b(H)-22,29,30-Trisnorhopane | $\delta^{13}\text{C}$ 17b(H)-30-Normoretane | $\delta^{13}\text{C}$ 17b(H),21b(H)-30-Norhopane AND 17b(H),21a(H)-moretane | $\delta^{13}\text{C}$ 17b(H),21b(H)-Homohopane | $\delta^{13}\text{C}$ 17b(H),21b(H)-hopane AND 17b(H),21a(H)-homomoretane |
|-----------|-----|-----------------------------------------------------|------------------------------------------------------|--------------------------------------------|--------------------------------------------------|-----------------------------------------------------|---------------------------------------------|-----------------------------------------------------------------------------|------------------------------------------------|---------------------------------------------------------------------------|
| 19DH-006  | PE  |                                                     |                                                      |                                            |                                                  |                                                     |                                             | -47.2                                                                       | -43.4                                          | -44.9                                                                     |
| 08DH-005  | PE  |                                                     | -39.1                                                |                                            |                                                  | -37.9                                               |                                             | -43.2                                                                       | -38.7                                          | -38.0                                                                     |
| 19DH-004  | PE  |                                                     |                                                      |                                            |                                                  | -32.8                                               |                                             | -37.1                                                                       | -33.7                                          |                                                                           |
| 19DH-002  | PE  |                                                     | -30.4                                                |                                            |                                                  | -35.6                                               |                                             | -41.6                                                                       | -34.5                                          | -36.4                                                                     |
| 19DH-003  | PE  |                                                     | -27.8                                                |                                            |                                                  | -32.3                                               |                                             |                                                                             | -32.6                                          |                                                                           |
| 12DH-020  | PE  |                                                     | -57.1                                                |                                            |                                                  |                                                     |                                             | -46.4                                                                       | -40.3                                          |                                                                           |
| 10DH-037  | PE  |                                                     |                                                      |                                            |                                                  |                                                     |                                             |                                                                             |                                                |                                                                           |
| NKT-31    | K   | -30.7                                               | -28.6                                                | -31.5                                      | -32.1                                            | -30.8                                               |                                             | -31.9                                                                       |                                                | -29.9                                                                     |
| NKT-32    | K   |                                                     | -27.8                                                |                                            |                                                  | -33.0                                               |                                             | -35.9                                                                       | -31.9                                          | -31.3                                                                     |
| NKT-51    | K   |                                                     | -28.5                                                |                                            |                                                  | -32.3                                               |                                             | -34.5                                                                       | -33.3                                          | -34.8                                                                     |
| 06SH-2.5  | K   |                                                     | -28.4                                                |                                            |                                                  | -29.7                                               | -31.2                                       | -32.0                                                                       | -30.0                                          | -31.3                                                                     |
| NKT-7     | K   |                                                     | -28.3                                                |                                            |                                                  |                                                     |                                             | -34.9                                                                       | -32.6                                          | -31.6                                                                     |
| LBB-07    | K   |                                                     | -27.5                                                |                                            | -34.8                                            |                                                     |                                             | -35.9                                                                       | -31.7                                          | -31.8                                                                     |
| LBB-24    | K   |                                                     |                                                      |                                            |                                                  |                                                     |                                             |                                                                             |                                                |                                                                           |
| LBB-20    | K   |                                                     |                                                      | -48.7                                      |                                                  | -46.6                                               |                                             | -56.4                                                                       | -41.7                                          | -43.7                                                                     |
| 06SH-16   | K   |                                                     |                                                      |                                            |                                                  | -42.5                                               |                                             | -49.7                                                                       | -42.8                                          |                                                                           |
| 06SH-9.4  | K   |                                                     |                                                      |                                            |                                                  | -31.3                                               |                                             | -37.3                                                                       | -33.4                                          | -35.7                                                                     |
| 06SH-16.6 | K   | -31.1                                               | -29.0                                                |                                            | -33.5                                            | -30.9                                               |                                             | -34.9                                                                       | -33.8                                          | -33.7                                                                     |
| 06SH-14.6 | K   |                                                     |                                                      |                                            | -43.1                                            | -39.3                                               |                                             | -44.5                                                                       | -39.9                                          | -43.2                                                                     |
| 06SH-16.1 | K   |                                                     | -33.2                                                |                                            |                                                  | -33.1                                               |                                             | -37.5                                                                       | -34.5                                          | -35.3                                                                     |

**Table S9.** Conifer-derived diterpane  $\delta^{13}\text{C}$  values (‰, VPDB), average diterpane  $\delta^{13}\text{C}$  values (‰, VPDB), and calculated conifer leaf  $\delta^{13}\text{C}$  values (‰, VPDB)

| Sample ID | Age | $\delta^{13}\text{C}$ 18-Norisopimarane | $\delta^{13}\text{C}$ 18-Norpimarane | $\delta^{13}\text{C}$ Diterpenane (Unidentified, MW=274) | $\delta^{13}\text{C}$ Pimarane | $\delta^{13}\text{C}$ Diterpenoids | $\delta^{13}\text{C}_{\text{leaf}}$ (diterpenoids) |
|-----------|-----|-----------------------------------------|--------------------------------------|----------------------------------------------------------|--------------------------------|------------------------------------|----------------------------------------------------|
| 19DH-006  | PE  |                                         |                                      |                                                          |                                |                                    |                                                    |
| 08DH-005  | PE  |                                         |                                      | -31.2                                                    |                                | -31.2                              | -30.5                                              |
| 19DH-004  | PE  |                                         |                                      | -29.5                                                    |                                | -29.5                              | -28.7                                              |
| 19DH-002  | PE  |                                         |                                      | -27.3                                                    |                                | -27.3                              | -26.5                                              |
| 19DH-003  | PE  | -27.7                                   | -27.2                                | -28.5                                                    | -27.5                          | -27.7                              | -27.0                                              |
| 12DH-020  | PE  |                                         |                                      | -29.8                                                    |                                | -29.8                              | -29.1                                              |
| 10DH-037  | PE  |                                         | -25.4                                |                                                          | -28.4                          | -26.9                              | -26.2                                              |
| NKT-31    | K   | -22.2                                   | -25.7                                |                                                          | -22.3                          | -23.4                              | -22.7                                              |
| NKT-32    | K   |                                         | -25.1                                |                                                          | -28.9                          | -27.0                              | -26.3                                              |
| NKT-51    | K   |                                         |                                      |                                                          |                                |                                    |                                                    |
| 06SH-2.5  | K   |                                         |                                      | -27.9                                                    | -28.1                          | -28.0                              | -27.3                                              |
| NKT-7     | K   |                                         | -29.7                                | -29.9                                                    |                                | -29.8                              | -29.1                                              |
| LBB-07    | K   |                                         |                                      |                                                          |                                |                                    |                                                    |
| LBB-24    | K   |                                         |                                      |                                                          |                                |                                    |                                                    |
| LBB-20    | K   |                                         |                                      |                                                          |                                |                                    |                                                    |
| 06SH-16   | K   |                                         |                                      |                                                          |                                |                                    |                                                    |
| 06SH-9.4  | K   |                                         |                                      |                                                          |                                |                                    |                                                    |
| 06SH-16.6 | K   |                                         |                                      |                                                          |                                |                                    |                                                    |
| 06SH-14.6 | K   |                                         |                                      |                                                          |                                |                                    |                                                    |
| 06SH-16.1 | K   |                                         |                                      |                                                          |                                |                                    |                                                    |

**Table S10.** *n*-Alkane  $\delta^2\text{H}$  values (‰, VSMOW) and calculated water  $\delta^2\text{H}$  values (‰, VSMOW) for *n*-C<sub>29</sub> alkane

| Sample ID | Age | $\delta^2\text{H}$ <i>n</i> -C <sub>23</sub> | $\delta^2\text{H}$ <i>n</i> -C <sub>25</sub> | $\delta^2\text{H}$ <i>n</i> -C <sub>27</sub> | $\delta^2\text{H}$ <i>n</i> -C <sub>29</sub> | $\delta^2\text{H}$ <i>n</i> -C <sub>31</sub> | $\delta^2\text{H}$ <i>n</i> -C <sub>33</sub> | $\delta^2\text{H}_{\text{water-C}_{29}}$ |
|-----------|-----|----------------------------------------------|----------------------------------------------|----------------------------------------------|----------------------------------------------|----------------------------------------------|----------------------------------------------|------------------------------------------|
| 19DH-006  | PE  |                                              |                                              |                                              |                                              |                                              |                                              |                                          |
| 08DH-005  | PE  | -306.4                                       | -307.5                                       | -284.3                                       | -278.2                                       | -261.0                                       | -257.1                                       | -189.0                                   |
| 19DH-004  | PE  | -273.9                                       | -272.2                                       | -264.0                                       | -251.7                                       | -240.2                                       |                                              | -159.2                                   |
| 19DH-002  | PE  | -295.6                                       | -297.3                                       | -278.5                                       | -255.8                                       | -238.9                                       | -237.5                                       | -163.8                                   |
| 19DH-003  | PE  | -292.6                                       | -291.0                                       | -269.7                                       | -249.2                                       | -236.2                                       | -247.7                                       | -156.5                                   |
| 12DH-020  | PE  | -266.2                                       | -259.8                                       | -247.2                                       | -239.7                                       | -230.0                                       | -223.5                                       | -145.7                                   |
| 10DH-037  | PE  | -241.1                                       | -233.1                                       | -225.2                                       | -217.3                                       | -210.3                                       | -217.8                                       | -120.6                                   |
| NKT-31    | K   | -257.8                                       | -242.5                                       | -240.3                                       | -232.6                                       | -215.9                                       | -220.1                                       | -137.8                                   |
| NKT-32    | K   | -262.8                                       | -251.0                                       | -243.1                                       | -235.2                                       | -209.4                                       |                                              | -140.7                                   |
| NKT-51    | K   | -250.1                                       | -241.8                                       | -233.2                                       | -228.3                                       | -213.4                                       | -206.8                                       | -133.0                                   |
| 06SH-2.5  | K   | -265.7                                       | -257.5                                       | -252.9                                       | -242.0                                       | -212.9                                       |                                              | -148.4                                   |
| NKT-7     | K   | -238.1                                       | -228.4                                       | -228.6                                       | -229.3                                       | -216.9                                       | -215.3                                       | -134.0                                   |
| LBB-07    | K   | -233.3                                       | -221.1                                       | -221.7                                       | -185.2                                       | -191.6                                       | -219.2                                       | -84.5                                    |
| LBB-24    | K   | -253.4                                       | -244.1                                       | -245.5                                       | -225.7                                       | -217.3                                       | -219.0                                       | -130.0                                   |
| LBB-20    | K   | -255.3                                       | -245.7                                       | -240.7                                       | -233.6                                       | -213.1                                       | -204.3                                       | -138.9                                   |
| 06SH-16   | K   | -236.2                                       | -243.7                                       | -238.3                                       | -235.4                                       | -219.7                                       | -202.6                                       | -140.9                                   |
| 06SH-9.4  | K   | -247.8                                       | -249.0                                       | -245.7                                       | -248.4                                       | -236.5                                       | -222.9                                       | -155.5                                   |
| 06SH-16.6 | K   | -266.5                                       | -259.7                                       | -237.5                                       | -242.7                                       | -226.6                                       | -219.1                                       | -149.1                                   |
| 06SH-14.6 | K   | -258.7                                       | -254.1                                       | -246.4                                       | -240.5                                       | -238.2                                       | -182.6                                       | -146.6                                   |

|           |   |        |        |        |        |        |        |        |
|-----------|---|--------|--------|--------|--------|--------|--------|--------|
| 06SH-16.1 | K | -263.7 | -256.5 | -240.4 | -238.8 | -226.3 | -222.5 | -144.7 |
|-----------|---|--------|--------|--------|--------|--------|--------|--------|
